# Supplementary material
Source: PubMed Central journal article supplement (PMC4294041)
Supplement: bph0171-5295-sd2.pdf [file bph0171-5295-sd2.pdf]

## Supplementary information

Molecular mechanism of allosteric modulation at G protein-coupled receptors: insight from a binding kinetics study at the human adenosine A<sub>1</sub> receptor

Dong Guo, Suzanne N. Venhorst, Arnault Massink, Jacobus P. D. van Veldhoven, Georges Vauquelin, Adriaan P. IJzerman & Laura H. Heitman

Division of Medicinal Chemistry, Leiden Academic Centre for Drug Research (LACDR), Leiden University, P.O. Box 9502, 2300 RA Leiden, the Netherlands (D.G.; S.N.V.; A.M.; J.P.D.V.; A.P.IJ.; L.H.H); Institute for Molecular Biology and Biotechnology, Free University of Brussels (VUB), Pleinlaan 2, B-1050 Brussel, Belgium (G.V).

### Table of Contents

|                              |           |
|------------------------------|-----------|
| <b>SYNTHESIS</b> .....       | <b>2</b>  |
| <b>DATA SIMULATION</b> ..... | <b>6</b>  |
| <b>FIGURE S1</b> .....       | <b>10</b> |
| <b>REFERENCES</b> .....      | <b>10</b> |

## Synthesis

All solvents and reagents were purchased from commercial sources and were of analytical grade.  $^1\text{H}$  and  $^{13}\text{C}$  NMR spectra were recorded on a Bruker AV 400 liquid spectrometer ( $^1\text{H}$  NMR, 400 MHz;  $^{13}\text{C}$  NMR, 100 MHz) at ambient temperature. Chemical shifts are reported in parts per million (ppm), are designated by  $\delta$  and are downfield to the internal standard tetramethylsilane (TMS). Coupling-constants are reported in Hz and are designated as J. High resolution mass spectrometry was performed by Leiden Institute of Chemistry and recorded by direct injection (2  $\mu\text{L}$  of a 2  $\mu\text{M}$  solution in water/MeCN; 50/50; v/v and 0.1% formic acid) on a mass spectrometer (Thermo Finnigan LTQ Orbitrap) equipped with an electrospray ion source in positive mode (source voltage 3.5 kV, sheath gas flow 10, capillary temperature 275°C) with resolution  $R = 60000$  at  $m/z$  400 (mass range  $m/z = 150\text{-}2000$ ) and calibrated for dioctylphthalate ( $m/z = 391.28428$ ). Analytical purity of the final compounds was determined by high performance liquid chromatography (HPLC) with a Phenomenex Gemini 3u C18 110A column (50 x 4.6 mm, 3  $\mu\text{m}$ ), measuring UV absorbance at 254 nm. Sample preparation and HPLC method were as follows, unless stated otherwise: 0.3-0.8 mg of compound was dissolved in 1 mL of a 1:1:1 mixture of  $\text{CH}_3\text{CN}/\text{H}_2\text{O}/t\text{-BuOH}$  and eluted from the column within 15 minutes, with a three component system of  $\text{H}_2\text{O}/\text{CH}_3\text{CN}/1\%$  TFA in  $\text{H}_2\text{O}$ , decreasing polarity of the solvent mixture in time from 80/10/10 to 0/90/10. All compounds showed a single peak at the designated retention time and are at least 95% pure. Thin-layer chromatography (TLC) was routinely consulted to monitor the progress of reactions, using aluminum-coated Merck silica gel  $\text{F}_{254}$  plates. Purification by column chromatography was achieved by use of Grace

Davison Davisil silica column material (LC60A 30-200 micron). Microwave reactions (MW) were performed in the Biotage Initiator in a closed vessel at a set temperature.

### Scheme S1

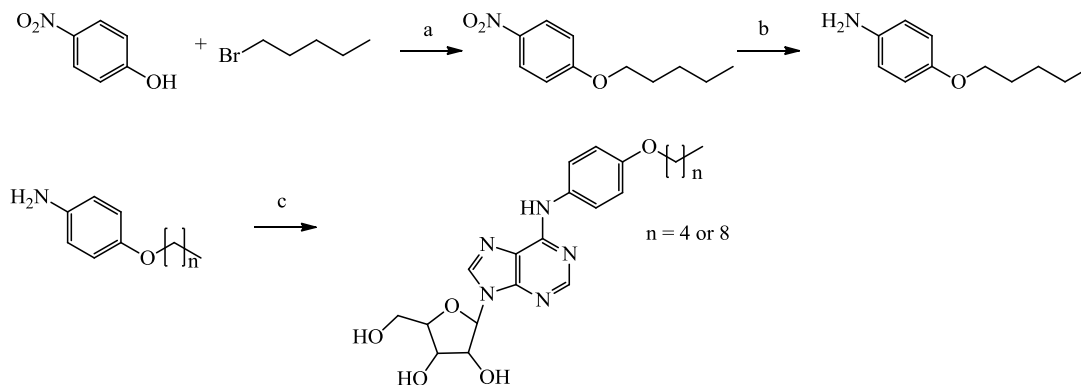

a) K<sub>2</sub>CO<sub>3</sub>, acetone, 70 °C, overnight; b) H<sub>2</sub>, Pd/C(10%), MeOH, RT, overnight; c) 6-chloroadenosine, Et<sub>3</sub>N, EtOH, MW, 120 °C, 2.5h.

#### 4-pentyloxy-nitrobenzene.

Procedure followed according to Narlawar *et al.* and Wada *et al.* (Narlawar *et al.*, 2010; Wada *et al.*, 2002). Yellow oil, quantitative yield.

<sup>1</sup>H NMR (400 MHz, CDCl<sub>3</sub>): δ 8.21 (d, *J* = 9.2 Hz, 2H), 6.94 (d, *J* = 9.2 Hz, 2H), 4.05 (t, *J* = 6.4 Hz, 2H), 1.86-1.58 (m, 2H), 1.50-1.35 (m, 4H), 0.94 (t, *J* = 7.2 Hz, 3H)

#### 4-pentyloxyaniline

Procedure based on Carrigan *et al.* (Carrigan *et al.*, 2002). 4-Pentyloxy-nitrobenzene (3.76 g, 18.0 mmol) was dissolved in MeOH, palladium (10% w/w on carbon) (38 mg,

1% w/w of starting material) was added and stirred overnight at room temperature in a Parr apparatus under a hydrogen (3 bar) atmosphere. By TLC (1 EtOAc: 4 Pet. ether) it was shown the reaction went to completion and subsequently the Pd/C was removed by filtration over celite. After evaporation of the filtrate *in vacuo* 3.16 g ( yield 98%) of a brown oil was obtained. <sup>1</sup>H NMR (400 MHz, CDCl<sub>3</sub>): δ 6.77 (d, *J* = 8.8 Hz, 2H), 6.67 (d, *J* = 8.8 Hz, 2H), 3.91 (t, *J* = 6.8 Hz, 2H), 3.31 (s br, 2H), 1.82-1.73 (m, 2H), 1.49-1.35 (m, 4H), 0.95 (t, *J* = 7.2 Hz, 3H)

#### **4-nonyloxyaniline**

Compound is commercially available from Alfa Aesar (Karlsruhe, Germany)

#### **N<sup>6</sup>-(4-pentyloxyphenyl)adenosine (LUF7161)**

Experimental procedure followed according to Narlawar *et al.* (Narlawar *et al.*, 2010).

White solid 356 mg, yield 82%. <sup>1</sup>H NMR (400 MHz, DMSO-d<sub>6</sub>): δ 9.81 (s, 1H), 8.50 (s, 1H), 8.33 (s, 1H), 7.76 (d, *J* = 9.2 Hz, 2H), 6.90 (d, *J* = 9.2 Hz, 2H), 5.94 (d, *J* = 6.0 Hz, 1H), 5.49 (d, *J* = 6.4 Hz, 1H), 5.33 (dd, *J* = 6.8, 4.8 Hz, 1H), 5.22 (d, *J* = 4.4 Hz, 1H), 4.63 (dd, *J* = 11.2, 6.0 Hz, 1H), 4.18-4.14 (m, 1H), 3.99-3.96 (m, 1H), 3.94 (t, *J* = 6.4 Hz, 2H), 3.72-3.66 (m, 1H), 3.60-3.54 (m, 1H), 1.71 (pentet, *J* = 6.8 Hz, 2H), 1.44-1.30 (m, 4H), 0.90 (t, *J* = 6.8 Hz, 3H). <sup>13</sup>C NMR (101 MHz, DMSO-d<sub>6</sub>): δ 154.8, 152.5, 152.2, 149.2, 140.6, 132.5, 122.9, 120.3, 114.3, 88.1, 86.1, 73.8, 70.8, 67.7, 61.8, 28.6, 27.9, 22.1, 14.1. HPLC: purity 99%, retention time 7.74 min. HRMS (ESI) *m/z* calcd for C<sub>21</sub>H<sub>27</sub>N<sub>5</sub>O<sub>5</sub><sup>+</sup>: 430.20850, found: 430.20807

***N*<sup>6</sup>-(4-nonyloxyphenyl) adenosine (LUF7160)**

Experimental procedure followed according to Narlawar *et al.* (Narlawar *et al.*, 2010).

Off white solid 381 mg, yield 78%. <sup>1</sup>H NMR (400 MHz, DMSO-d<sub>6</sub>): δ 9.82 (s, 1H), 8.50 (s, 1H), 8.33 (s, 1H), 7.76 (d, *J* = 8.8 Hz, 2H), 6.89 (d, *J* = 9.2 Hz, 2H), 5.94 (d, *J* = 6.4 Hz, 1H), 5.49 (d, *J* = 6.4 Hz, 1H), 5.33 (dd, *J* = 6.8, 4.8 Hz, 1H), 5.22 (d, *J* = 4.8 Hz, 1H), 4.63 (dd, *J* = 11.2, 6.0 Hz, 1H), 4.18-4.14 (m, 1H), 3.99-3.96 (m, 1H), 3.93 (t, *J* = 6.4 Hz, 2H), 3.72-3.66 (m, 1H), 3.60-3.54 (m, 1H), 1.70 (pentet, *J* = 7.2 Hz, 2H), 1.43-1.36 (m, 2H), 1.35-1.20 (m, 10H), 0.86 (t, *J* = 6.8 Hz, 3H). <sup>13</sup>C NMR (101 MHz, DMSO-d<sub>6</sub>): δ 154.7, 152.4, 152.2, 149.2, 140.6, 132.5, 122.8, 120.3, 114.3, 88.1, 86.1, 73.8, 70.8, 67.7, 61.8, 31.5, 29.2, 29.0, 28.9, 28.8, 25.7, 22.3, 14.1. HPLC: purity 100%, retention time 10.63 min. HRMS (ESI) *m/z* calcd for C<sub>25</sub>H<sub>35</sub>N<sub>5</sub>O<sub>5</sub><sup>+</sup>: 486.27110, found: 486.270840

## Data simulation

**Table S1.** Data simulation of the binding of radioligand, 'c', during a period of 50 min, either alone or in the presence of increasing concentrations of the bitopic ligand, 'ab'. The microscopic binding kinetics of the bitopic ligand 'ab' was defined as  $k_{+a} = 1 \times 10^5 \text{ M}^{-1} \cdot \text{min}^{-1}$ ,  $k_{-a} = 1 \text{ min}^{-1}$ ,  $k_{+b} = 1 \times 10^5 \text{ M}^{-1} \cdot \text{min}^{-1}$ ,  $k_{-b} = 1 \text{ min}^{-1}$  and  $[L] = 0.29 \text{ mM}$ . The binding kinetics of the monovalent ligand 'c' was defined as  $k_{+c} = 1 \times 10^7 \text{ M}^{-1} \cdot \text{min}^{-1}$ ,  $k_{-c} = 0.3 \text{ min}^{-1}$  and  $[c] = 100 \text{ nM}$ . The cooperativity factors of 'ab' were set as  $\alpha_{ab} = 10$ .

| time | Concentration of 'ab'(nM) |       |       |       |       |       |       |
|------|---------------------------|-------|-------|-------|-------|-------|-------|
|      | 0                         | 100   | 300   | 1000  | 3000  | 10000 | 30000 |
| 0    | 0.00                      | 0.00  | 0.00  | 0.00  | 0.00  | 0.00  | 0.00  |
| 0.5  | 36.77                     | 36.60 | 36.26 | 35.11 | 32.10 | 24.04 | 12.74 |
| 1.0  | 55.96                     | 55.47 | 54.51 | 51.31 | 43.54 | 26.85 | 11.60 |
| 1.5  | 65.98                     | 65.15 | 63.54 | 58.34 | 46.53 | 25.24 | 10.23 |
| 2.0  | 71.21                     | 70.07 | 67.87 | 60.93 | 46.09 | 22.86 | 9.02  |
| 2.5  | 73.94                     | 72.52 | 69.79 | 61.35 | 44.30 | 20.52 | 7.98  |
| 3.0  | 75.37                     | 73.68 | 70.47 | 60.74 | 42.02 | 18.39 | 7.08  |
| 3.5  | 76.11                     | 74.18 | 70.53 | 59.64 | 39.64 | 16.50 | 6.30  |
| 4.0  | 76.50                     | 74.33 | 70.26 | 58.31 | 37.30 | 14.82 | 5.63  |
| 4.5  | 76.70                     | 74.30 | 69.82 | 56.91 | 35.07 | 13.33 | 5.04  |
| 5.0  | 76.8                      | 74.8  | 71.0  | 60.0  | 41.3  | 21.6  | 13.0  |
| 10   | 76.92                     | 72.18 | 63.78 | 42.99 | 18.37 | 4.97  | 2.08  |
| 15   | 76.92                     | 70.21 | 58.88 | 33.94 | 11.26 | 2.94  | 1.51  |
| 20   | 76.92                     | 68.40 | 54.60 | 27.42 | 7.81  | 2.36  | 1.38  |
| 25   | 76.92                     | 66.72 | 50.88 | 22.73 | 6.13  | 2.19  | 1.35  |
| 30   | 76.92                     | 65.16 | 47.64 | 19.35 | 5.32  | 2.14  | 1.34  |
| 35   | 76.92                     | 63.72 | 44.81 | 16.91 | 4.92  | 2.13  | 1.34  |
| 40   | 76.92                     | 62.39 | 42.35 | 15.16 | 4.73  | 2.12  | 1.34  |
| 45   | 76.92                     | 61.16 | 40.21 | 13.89 | 4.64  | 2.12  | 1.34  |
| 50   | 76.92                     | 60.02 | 38.34 | 12.98 | 4.59  | 2.12  | 1.34  |

Data are shown as the percentage of  $B_{\text{max}}$ .

**Table S2** Data simulation of the binding of radioligand, 'c', during a period of 50 min, either alone or in the presence of increasing concentrations of the bitopic ligand, 'ab'. The microscopic binding kinetics of the bitopic ligand 'ab' was defined as  $k_{+a} = 1 \times 10^5 \text{ M}^{-1} \cdot \text{min}^{-1}$ ,  $k_{-a} = 1 \text{ min}^{-1}$ ,  $k_{+b} = 1 \times 10^5 \text{ M}^{-1} \cdot \text{min}^{-1}$ ,  $k_{-b} = 1 \text{ min}^{-1}$  and  $[L] = 0.29 \text{ mM}$ . The binding kinetics of the monovalent ligand 'c' was defined as  $k_{+c} = 1 \times 10^7 \text{ M}^{-1} \cdot \text{min}^{-1}$ ,  $k_{-c} = 0.3 \text{ min}^{-1}$  and  $[c] = 100 \text{ nM}$ . The cooperativity factors of 'ab' were set as  $\alpha_{ab} = 0.1$ .

| time | Concentration of 'ab'(nM) |       |       |       |       |       |       |
|------|---------------------------|-------|-------|-------|-------|-------|-------|
|      | 0                         | 100   | 300   | 1000  | 3000  | 10000 | 30000 |
| 0    | 0.00                      | 0.00  | 0.00  | 0.00  | 0.00  | 0.00  | 0.00  |
| 0.5  | 36.77                     | 36.67 | 36.48 | 35.82 | 34.07 | 29.24 | 21.79 |
| 1.0  | 55.96                     | 55.69 | 55.16 | 53.39 | 48.96 | 38.71 | 27.41 |
| 1.5  | 65.98                     | 65.56 | 64.74 | 62.06 | 55.70 | 42.77 | 30.89 |
| 2.0  | 71.21                     | 70.69 | 69.67 | 66.38 | 58.93 | 45.13 | 33.60 |
| 2.5  | 73.94                     | 73.35 | 72.21 | 68.57 | 60.59 | 46.77 | 35.75 |
| 3.0  | 75.37                     | 74.74 | 73.52 | 69.69 | 61.52 | 48.00 | 37.47 |
| 3.5  | 76.11                     | 75.46 | 74.20 | 70.27 | 62.08 | 48.96 | 38.84 |
| 4.0  | 76.50                     | 75.83 | 74.55 | 70.58 | 62.44 | 49.70 | 39.94 |
| 4.5  | 76.70                     | 76.03 | 74.73 | 70.75 | 62.70 | 50.29 | 40.82 |
| 5.0  | 76.81                     | 76.13 | 74.83 | 70.85 | 62.88 | 50.75 | 41.53 |
| 10   | 76.92                     | 76.24 | 74.93 | 71.01 | 63.42 | 52.28 | 44.03 |
| 15   | 76.92                     | 76.24 | 74.93 | 71.02 | 63.47 | 52.42 | 44.29 |
| 20   | 76.92                     | 76.24 | 74.93 | 71.02 | 63.47 | 52.43 | 44.32 |
| 25   | 76.92                     | 76.24 | 74.93 | 71.02 | 63.47 | 52.43 | 44.33 |
| 30   | 76.92                     | 76.24 | 74.93 | 71.02 | 63.47 | 52.43 | 44.33 |
| 35   | 76.92                     | 76.24 | 74.93 | 71.02 | 63.47 | 52.43 | 44.33 |
| 40   | 76.92                     | 76.24 | 74.93 | 71.02 | 63.47 | 52.43 | 44.33 |
| 45   | 76.92                     | 76.24 | 74.93 | 71.02 | 63.47 | 52.43 | 44.33 |
| 50   | 76.92                     | 76.24 | 74.93 | 71.02 | 63.47 | 52.43 | 44.33 |

Data are shown as the percentage of  $B_{\text{max}}$ .

**Table S3** Data simulation of the binding of radioligand, 'c', during a period of 50 min, either alone or in the presence of increasing concentrations of the bitopic ligand, 'ab'. The microscopic binding kinetics of the bitopic ligand 'ab' was defined as  $k_{+a} = 1 \times 10^5 \text{ M}^{-1} \cdot \text{min}^{-1}$ ,  $k_{-a} = 1 \text{ min}^{-1}$ ,  $k_{+b} = 1 \times 10^5 \text{ M}^{-1} \cdot \text{min}^{-1}$ ,  $k_{-b} = 1 \text{ min}^{-1}$  and  $[L] = 0.29 \text{ mM}$ . The binding kinetics of the monovalent ligand 'c' was defined as  $k_{+c} = 1 \times 10^7 \text{ M}^{-1} \cdot \text{min}^{-1}$ ,  $k_{-c} = 0.3 \text{ min}^{-1}$  and  $[c] = 100 \text{ nM}$ . The cooperativity factors of 'ab' were set as  $\alpha'_{ab} = 10$ .

| time | Concentration of 'ab'(nM) |       |       |       |       |       |       |
|------|---------------------------|-------|-------|-------|-------|-------|-------|
|      | 0                         | 100   | 300   | 1000  | 3000  | 10000 | 30000 |
| 0    | 0.00                      | 0.00  | 0.00  | 0.00  | 0.00  | 0.00  | 0.00  |
| 0.5  | 36.77                     | 36.61 | 36.30 | 35.25 | 32.47 | 24.93 | 13.99 |
| 1.0  | 55.96                     | 55.50 | 54.59 | 51.58 | 44.20 | 28.07 | 12.81 |
| 1.5  | 65.98                     | 65.20 | 63.67 | 58.72 | 47.38 | 26.51 | 11.32 |
| 2.0  | 71.21                     | 70.13 | 68.03 | 61.39 | 47.06 | 24.11 | 10.00 |
| 2.5  | 73.94                     | 72.59 | 69.98 | 61.89 | 45.34 | 21.71 | 8.86  |
| 3.0  | 75.37                     | 73.76 | 70.69 | 61.33 | 43.12 | 19.52 | 7.86  |
| 3.5  | 76.11                     | 74.27 | 70.77 | 60.28 | 40.77 | 17.56 | 7.00  |
| 4.0  | 76.50                     | 74.43 | 70.52 | 59.01 | 38.45 | 15.81 | 6.25  |
| 4.5  | 76.70                     | 74.41 | 70.11 | 57.64 | 36.23 | 14.26 | 5.60  |
| 5.0  | 76.81                     | 74.30 | 69.62 | 56.26 | 34.13 | 12.88 | 5.04  |
| 10   | 76.92                     | 72.37 | 64.28 | 44.00 | 19.35 | 5.35  | 2.23  |
| 15   | 76.92                     | 70.47 | 59.51 | 35.00 | 11.95 | 3.09  | 1.56  |
| 20   | 76.92                     | 68.71 | 55.32 | 28.43 | 8.25  | 2.41  | 1.39  |
| 25   | 76.92                     | 67.08 | 51.66 | 23.63 | 6.40  | 2.21  | 1.35  |
| 30   | 76.92                     | 65.56 | 48.45 | 20.12 | 5.47  | 2.15  | 1.34  |
| 35   | 76.92                     | 64.15 | 45.64 | 17.56 | 5.01  | 2.13  | 1.34  |
| 40   | 76.92                     | 62.84 | 43.17 | 15.70 | 4.78  | 2.12  | 1.34  |
| 45   | 76.92                     | 61.63 | 41.01 | 14.33 | 4.66  | 2.12  | 1.34  |
| 50   | 76.92                     | 60.50 | 39.12 | 13.34 | 4.60  | 2.12  | 1.34  |

Data are shown as the percentage of  $B_{\text{max}}$ .



**Table S4** Data simulation of the binding of radioligand, 'c', during a period of 50 min, either alone or in the presence of increasing concentrations of the bitopic ligand, 'ab'. The microscopic binding kinetics of the bitopic ligand 'ab' was defined as  $k_{+a} = 1 \times 10^5 \text{ M}^{-1} \cdot \text{min}^{-1}$ ,  $k_{-a} = 1 \text{ min}^{-1}$ ,  $k_{+b} = 1 \times 10^5 \text{ M}^{-1} \cdot \text{min}^{-1}$ ,  $k_{-b} = 1 \text{ min}^{-1}$  and  $[L] = 0.29 \text{ mM}$ . The binding kinetics of the monovalent ligand 'c' was defined as  $k_{+c} = 1 \times 10^7 \text{ M}^{-1} \cdot \text{min}^{-1}$ ,  $k_{-c} = 0.3 \text{ min}^{-1}$  and  $[c] = 100 \text{ nM}$ . The cooperativity factors of 'ab' were set as  $\alpha'_{ab} = 0.1$ .

| time | Concentration of 'ab'(nM) |       |       |       |       |       |       |
|------|---------------------------|-------|-------|-------|-------|-------|-------|
|      | 0                         | 100   | 300   | 1000  | 3000  | 10000 | 30000 |
| 0    | 0.00                      | 0.00  | 0.00  | 0.00  | 0.00  | 0.00  | 0.00  |
| 0.5  | 36.77                     | 36.65 | 36.41 | 35.60 | 33.46 | 27.64 | 19.03 |
| 1.0  | 55.96                     | 55.65 | 55.03 | 52.99 | 47.95 | 36.67 | 25.05 |
| 1.5  | 65.98                     | 65.51 | 64.60 | 61.62 | 54.68 | 41.15 | 29.45 |
| 2.0  | 71.21                     | 70.64 | 69.53 | 65.97 | 58.07 | 44.04 | 32.84 |
| 2.5  | 73.94                     | 73.31 | 72.08 | 68.22 | 59.93 | 46.12 | 35.46 |
| 3.0  | 75.37                     | 74.70 | 73.42 | 69.41 | 61.03 | 47.66 | 37.48 |
| 3.5  | 76.11                     | 75.43 | 74.11 | 70.05 | 61.74 | 48.82 | 39.04 |
| 4.0  | 76.50                     | 75.81 | 74.48 | 70.42 | 62.22 | 49.70 | 40.24 |
| 4.5  | 76.70                     | 76.01 | 74.68 | 70.63 | 62.55 | 50.36 | 41.17 |
| 5.0  | 76.81                     | 76.11 | 74.79 | 70.76 | 62.79 | 50.86 | 41.89 |
| 10   | 76.92                     | 76.23 | 74.93 | 71.01 | 63.43 | 52.33 | 44.14 |
| 15   | 76.92                     | 76.24 | 74.93 | 71.02 | 63.47 | 52.42 | 44.31 |
| 20   | 76.92                     | 76.24 | 74.93 | 71.02 | 63.47 | 52.43 | 44.33 |
| 25   | 76.92                     | 76.24 | 74.93 | 71.02 | 63.47 | 52.43 | 44.33 |
| 30   | 76.92                     | 76.24 | 74.93 | 71.02 | 63.47 | 52.43 | 44.33 |
| 35   | 76.92                     | 76.24 | 74.93 | 71.02 | 63.47 | 52.43 | 44.33 |
| 40   | 76.92                     | 76.24 | 74.93 | 71.02 | 63.47 | 52.43 | 44.33 |
| 45   | 76.92                     | 76.24 | 74.93 | 71.02 | 63.47 | 52.43 | 44.33 |
| 50   | 76.92                     | 76.24 | 74.93 | 71.02 | 63.47 | 52.43 | 44.33 |

Data are shown as the percentage of  $B_{\text{max}}$ .

## References

Carrigan CN, Bartlett RD, Esslinger CS, Cybulski KA, Tongcharoensirikul P, Bridges RJ, *et al.* (2002). Synthesis and in vitro pharmacology of substituted quinoline-2,4-dicarboxylic acids as inhibitors of vesicular glutamate transport. *J Med Chem* **45**(11): 2260-2276.

Narlawar R, Lane JR, Doddareddy M, Lin J, Brussee J, IJzerman AP (2010). Hybrid ortho/allosteric ligands for the adenosine A<sub>1</sub> receptor. *J Med Chem* **53**(8): 3028-3037.

Wada S, Urano M, Suzuki H (2002). The newborn surface of dull metals in organic synthesis. Bismuth-mediated solvent-free one-step conversion of nitroarenes to azoxy- and azoarenes. *J Org Chem* **67**(23): 8254-8257.

## Figure S1

Competition association assay of a radioligand, 'c' (with  $k_{+c} = 1 \cdot 10^7 \text{ M}^{-1} \cdot \text{min}^{-1}$ ,  $k_{-c} = 0.3 \text{ min}^{-1}$  and  $[c] = 100 \text{ nM}$ ), during a period of 50 min, either alone or in the presence of increasing concentrations of 'ab' ( $k_{+a} = 1 \times 10^5 \text{ M}^{-1} \cdot \text{min}^{-1}$ ,  $k_{-a} = 1 \text{ min}^{-1}$ ,  $k_{+b} = 1 \times 10^5 \text{ M}^{-1} \cdot \text{min}^{-1}$ ,  $k_{-b} = 1 \text{ min}^{-1}$  and  $[L] = 0.29 \text{ mM}$ ) with different cooperativity factors: 1)  $\alpha_{ab} = 10$ ; 2)  $\alpha_{ab} = 0.1$ ; 3)  $\alpha'_{ab} = 10$ ; 4)  $\alpha'_{ab} = 0.1$ . Data input into this analysis were from Table S1 to S4, respectively.
